# Supplementary material for: Improved relative temperature sensitivity of over 10% K−1 in fluoride nanocrystals via engineering the interfacial layer
Source: Royal Society of Chemistry journal article supplement (doi:10.1039/d2cc02548e), 2022-01-01
Supplement: d2cc02548e1.pdf [file d2cc02548e1.pdf]

## Supplementary Information for

### **Improved relative temperature sensitivity over 10% K<sup>-1</sup> in fluoride nanocrystals via engineering interfacial layer**

Enyang Liu<sup>a</sup>, Lei Lei<sup>a,b\*</sup>, Renguang Ye<sup>a</sup>, Degang Deng<sup>a</sup> and Shiqing Xu<sup>a\*</sup>

a. Key Laboratory of Rare Earth Optoelectronic Materials and Devices of Zhejiang Province, College of Optical and Electronic technology, China Jiliang University, Hangzhou 310018, China.

b. Department of Physics, Zhejiang Normal University, Jinhua, Zhejiang 321004, China.

E-Mail: leilei@cjlu.edu.cn; shiqingxu@cjlu.edu.cn

## Experimental section

**Materials.** All the raw chemicals, including Calcium carbonate ( $\text{CaCO}_3$ , 99.99%, aladdin), Strontium carbonate ( $\text{SrCO}_3$ , 99%, Aladdin), Barium carbonate ( $\text{BaCO}_3$ , 99.99%, Aladdin), Yttrium oxide ( $\text{Y}_2\text{O}_3$ , 99.99%, Aladdin), Ytterbium oxide ( $\text{Yb}_2\text{O}_3$ , 99.99%, Aladdin), Erbium oxide ( $\text{Er}_2\text{O}_3$ , 99.99%, Aladdin), Neodymium oxide ( $\text{Nd}_2\text{O}_3$ , 99.99%, Aladdin), Neodymium acetate hydrate ( $\text{Nd}(\text{Ac})_3$ , 99.9%, Sigma-Aldrich), Ytterbium acetate tetrahydrate ( $\text{Yb}(\text{Ac})_3$ , 99.99%, Aladdin), oleic acid (OA, 90%, Sigma-Aldrich), 1-octadecene (ODE, 90%, Sigma-Aldrich), Oleylamine (OLA, min. 70%, J&K), trifluoroacetic acid ( $\text{CF}_3\text{COOH}$ , TFA, 99.0%, Aladdin) were of analytical grade and were directly used as received without further refinement.

### Synthesis of the M-TFA and RE-TFA precursors.

Taking Ca-TFA as an example, 6mmol  $\text{CaCO}_3$  and 10 mL distilled water were added in a 50 mL three-neck flask. The mixture was heated to 95°C and then 2.5 mL TFA was added. After all the  $\text{CaCO}_3$  powder was completely dissolved and the solution was transparent, the water and remaining TFA were evaporated at 65°C to achieve a powder of 6 mmol Ca-TFA. The procedure for the synthesis of M-TFA and Ln-TFA precursors were similar to the case of Ca-TFA, except the utilization of their corresponding M carbonates or RE oxides with slightly different content.

**Synthesis of the RE-OA precursor.** Taking Yb-OA as an example, 5 mmol of  $\text{Yb}(\text{Ac})_3$  was added in a three-neck flask containing 10 mL OA and 10 mL ODE. The mixture solution was heated to 120 °C under  $\text{N}_2$  atmosphere and maintained for 1 h to remove water. After cooling down to room temperature, the slightly viscous precursor liquids were transferred into sample vials for later use. The procedure for the synthesis of Nd-OA precursors were similar to the case of Yb-OA,

**Synthesis of core NPs.** Taking  $\text{SrYbF}_5:40\text{Nd}$  NPs as an example, Sr-TFA (1mmol), Yb-TFA (1mmol $\times$ 0.6), Nd-TFA (1mmol $\times$ 0.4), OA (6 mL), ODE (12 mL) and OLA (2 mL) were added into a 50 mL three-necked flask. The mixture was heated at 120 °C for 90 min to remove water, and then quickly heated to 300 °C under  $\text{N}_2$  atmosphere and kept for 120 min. After cooling down to room temperature, the products were precipitated via the addition of ethanol, collected via centrifugation at 12000 rpm for 8

min, washed with cyclohexane and ethanol three times, and finally re-dispersed in 4 mL cyclohexane. The synthetic procedures for other kinds of core NPs were similar to that of SrYbF<sub>5</sub>:40Nd NPs.

**Synthesis of core/shell NPs.** Taking SrYF<sub>5</sub>:10Yb2Er@CaF<sub>2</sub> as an example, 2 mmol of Ca-TFA were added into a three-neck flask containing 2 mL OA and 3 mL ODE, and was heated at 120 °C under N<sub>2</sub> for 1 h to remove the remaining water. After cooling down to room temperature, the Ca-TFA precursor solution was transferred into a sample vials for later use. To prepare SrYF<sub>5</sub>:10Yb2Er@CaF<sub>2</sub> core/shell NPs, 0.5 mmol (4 mL) SrYF<sub>5</sub>:10Yb2Er core NPs, 5 mL OA and 10 mL ODE were added into a 50 mL three-neck flask. After removing cyclohexane at 65 °C for 1 h, the solution was heated to 120 °C under the N<sub>2</sub> and kept for 1.5 h. This solution was heated to 300 °C under N<sub>2</sub> atmosphere, and then the Ca-TFA precursor solution was injected and kept at 300 °C for 1 h.

**Synthesis of core/shell/shell NPs.** Taking SrYF<sub>5</sub>:10Yb2Er@CaF<sub>2</sub>@SrYbF<sub>5</sub>:40Nd as an example, 6 mmol of Sr-TFA were added into a three-neck flask containing 6 mL OA and 9 mL ODE, and was heated at 120 °C under N<sub>2</sub> for 1 h to remove the remaining water. After cooling down to room temperature, the Sr-TFA precursor solution was transferred into a sample vials for later use. The shell precursor was prepared by mixing the Yb-OA, Nd-OA and the Sr-TFA precursor solutions with a molar ratio of 0.6:0.4:1. To prepare SrYF<sub>5</sub>:10Yb2Er@CaF<sub>2</sub>@SrYbF<sub>5</sub>:40Nd core/shell/shell NPs, 0.5 mmol (4 mL) SrYF<sub>5</sub>:10Yb2Er@CaF<sub>2</sub> core/shell NPs, 5 mL OA and 10 mL ODE were added into a 50 mL three-neck flask. After removing cyclohexane at 65 °C for 1 h, the solution was heated to 120 °C under the N<sub>2</sub> and kept for 1.5 h. This solution was heated to 300 °C under N<sub>2</sub> atmosphere, and then 6.5 mL of the shell precursor was injected and kept at 300 °C for 1 h.

**Characterizations.** X-ray diffraction (XRD) analysis was carried out with a powder diffractometer (Bruker D8 Advance) with a Cu-K $\alpha$  ( $\lambda=1.5405$  Å) radiation. The morphology images of the products were characterized by a field emission transmission electron microscopy (FEI Tecnai G2 F20) equipped with an energy dispersive X-ray spectroscopy (EDX, Aztec X-Max 80T). The actual chemical compositions were

determined by an inductively coupled plasma - optical emission spectroscopy (ICP-OES) (Agilent 720ES, Plasma flow: 15.0L/min, Sample uptake delay: 15s, Replicate read time: 2s). UC emission spectra were carried out on an Edinburgh Instruments FLS920 spectrofluorimeter equipped with an adjustable laser diode (980 nm) and temperature controlling stage. Raman spectra were recorded by a micro-Raman spectrometer (Renishaw, inVia-Reflex) at room temperature in the frequency range of 150–1000  $\text{cm}^{-1}$  under the excitation of 532 nm laser.

**Table S1.** Comparison of temperature sensitivities of different reported ratiometric thermometers.

| Materials                                                                                                                                         | Temperature range (K) | $S_a$ -max(K <sup>-1</sup> ) | $S_r$ -max(%K <sup>-1</sup> ) | Ref.      |
|---------------------------------------------------------------------------------------------------------------------------------------------------|-----------------------|------------------------------|-------------------------------|-----------|
| Sr <sub>4</sub> La(PO <sub>4</sub> ) <sub>3</sub> O:Eu <sup>2+</sup> /Sm <sup>3+</sup>                                                            | 293-573               | /                            | 0.48                          | S1        |
| Ca <sub>8</sub> ZnLa(PO <sub>4</sub> ) <sub>7</sub> :Tb <sup>3+</sup> ,Eu <sup>3+</sup>                                                           | 298-448               | 0.34                         | 0.53                          | S2        |
| Y <sub>3</sub> Al <sub>5</sub> O <sub>12</sub> :Ti <sup>3+</sup> ,Ti <sup>4+</sup>                                                                | 123-573               | /                            | 0.71                          | S3        |
| YNbO <sub>4</sub> :Pr <sup>3+</sup> ,Tb <sup>3+</sup>                                                                                             | 293-508               | 0.0125                       | 1.01                          | S4        |
| Ca <sub>14</sub> Al <sub>10</sub> Zn <sub>6</sub> O <sub>35</sub> :Bi <sup>3+</sup> ,Mn <sup>4+</sup>                                             | 303-563               | 0.015                        | 1.21                          | S5        |
| LuNbO <sub>4</sub> :Pr <sup>3+</sup> ,Tb <sup>3+</sup>                                                                                            | 283-493               | 0.024                        | 1.26                          | S6        |
| Zn <sub>2</sub> GeO <sub>4</sub> :Mn <sup>2+</sup> ,Eu <sup>3+</sup>                                                                              | 293-353               | /                            | 1.96                          | S7        |
| LaPO <sub>4</sub> :Yb <sup>3+</sup> ,Tm <sup>3+</sup> ,Eu <sup>3+</sup>                                                                           | 293-679               | /                            | 2.4                           | S8        |
| Ca <sub>2</sub> Al <sub>2</sub> SiO <sub>7</sub> :Eu <sup>2+</sup> ,Eu <sup>3+</sup>                                                              | 303-443               | 0.024                        | 2.46                          | S9        |
| La <sub>1-y</sub> Gd <sub>y</sub> AlO <sub>3</sub> :Eu <sup>2+</sup> ,Eu <sup>3+</sup>                                                            | 303-473               | 0.084                        | 3.233                         | S10       |
| Zn <sub>2</sub> SiO <sub>4</sub> :Mn <sup>2+</sup> /Gd <sub>2</sub> O <sub>3</sub> :Eu <sup>3+</sup>                                              | 303-623               | 0.073                        | 3.05                          | S11       |
| CaNb <sub>2</sub> O <sub>6</sub> :Bi <sup>3+</sup> ,Eu <sup>3+</sup>                                                                              | 298-523               | 0.122                        | 3.793                         | S12       |
| GdNbO <sub>4</sub> :Bi <sup>3+</sup> ,Eu <sup>3+</sup>                                                                                            | 303-523               | 0.037                        | 3.81                          | S13       |
| ZrO <sub>2</sub> :Ti <sup>4+</sup> ,Eu <sup>3+</sup>                                                                                              | 3.3-413               | 0.414                        | 3.84                          | S14       |
| Li <sub>2</sub> TiO <sub>3</sub> :Mn <sup>4+</sup> and<br>Y <sub>2</sub> O <sub>3</sub> :Dy <sup>3+</sup>                                         | 273-373               | 0.0263                       | 4.43                          | S15       |
| Y <sub>2</sub> O <sub>3</sub> :Ho <sup>3+</sup> and<br>Mg <sub>2</sub> TiO <sub>4</sub> :Mn <sup>4+</sup>                                         | 303-373               | /                            | 4.60                          | S16       |
| Y <sub>3</sub> Al <sub>5</sub> O <sub>12</sub> :Eu <sup>3+</sup> ,Mn <sup>4+</sup>                                                                | 293-393               | 0.444                        | 4.81                          | S17       |
| LiTaO <sub>3</sub> :Ti <sup>4+</sup> ,Eu <sup>3+</sup>                                                                                            | 303-443               | 0.397                        | 5.425                         | S18       |
| Ca <sub>2</sub> MgWO <sub>6</sub> :Bi <sup>3+</sup> ,Eu <sup>3+</sup>                                                                             | 298-523               | 0.961                        | 8.52                          | S19       |
| NaYF <sub>4</sub> :60%Yb <sup>3+</sup> ,4%Nd <sup>3+</sup> @<br>NaYF <sub>4</sub> @NaYF <sub>4</sub> :20%Yb <sup>3+</sup> ,<br>2%Er <sup>3+</sup> | 293-413               | /                            | 9.60                          | S20       |
| SrYF <sub>5</sub> :10Yb2Er@CaF <sub>2</sub> @<br>SrYbF <sub>5</sub> :40Nd                                                                         | 303-413               | 2.56                         | 10.01                         | This work |

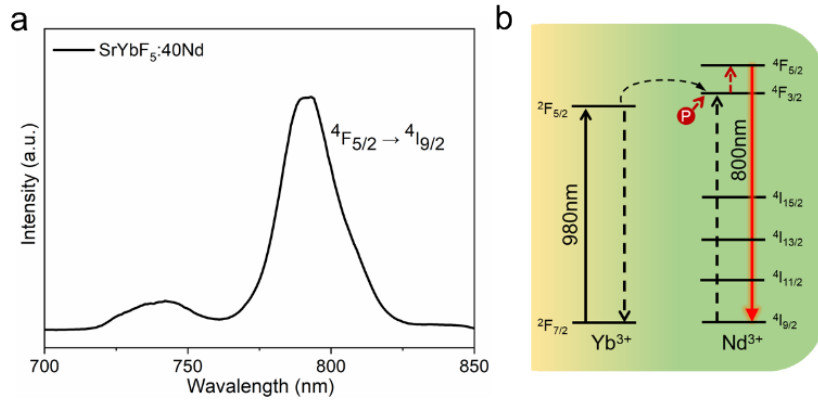

**Figure S1.** (a) UC emission spectra of the SrYbF<sub>5</sub>:40Nd NCs excited by 980 nm NIR light. (b) Proposed energy transfer UC mechanism between the Yb<sup>3+</sup> and Nd<sup>3+</sup> codopants.

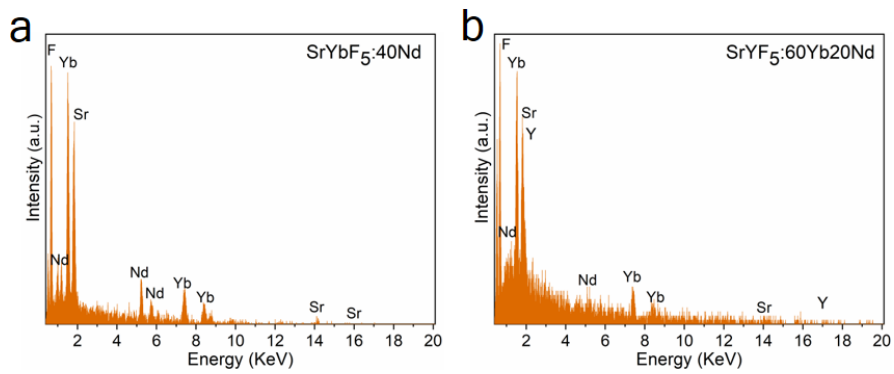

**Figure S2.** EDX spectra of (a) SrYbF<sub>5</sub>:40Nd and (b) SrYF<sub>5</sub>:60Yb20Nd NCs.

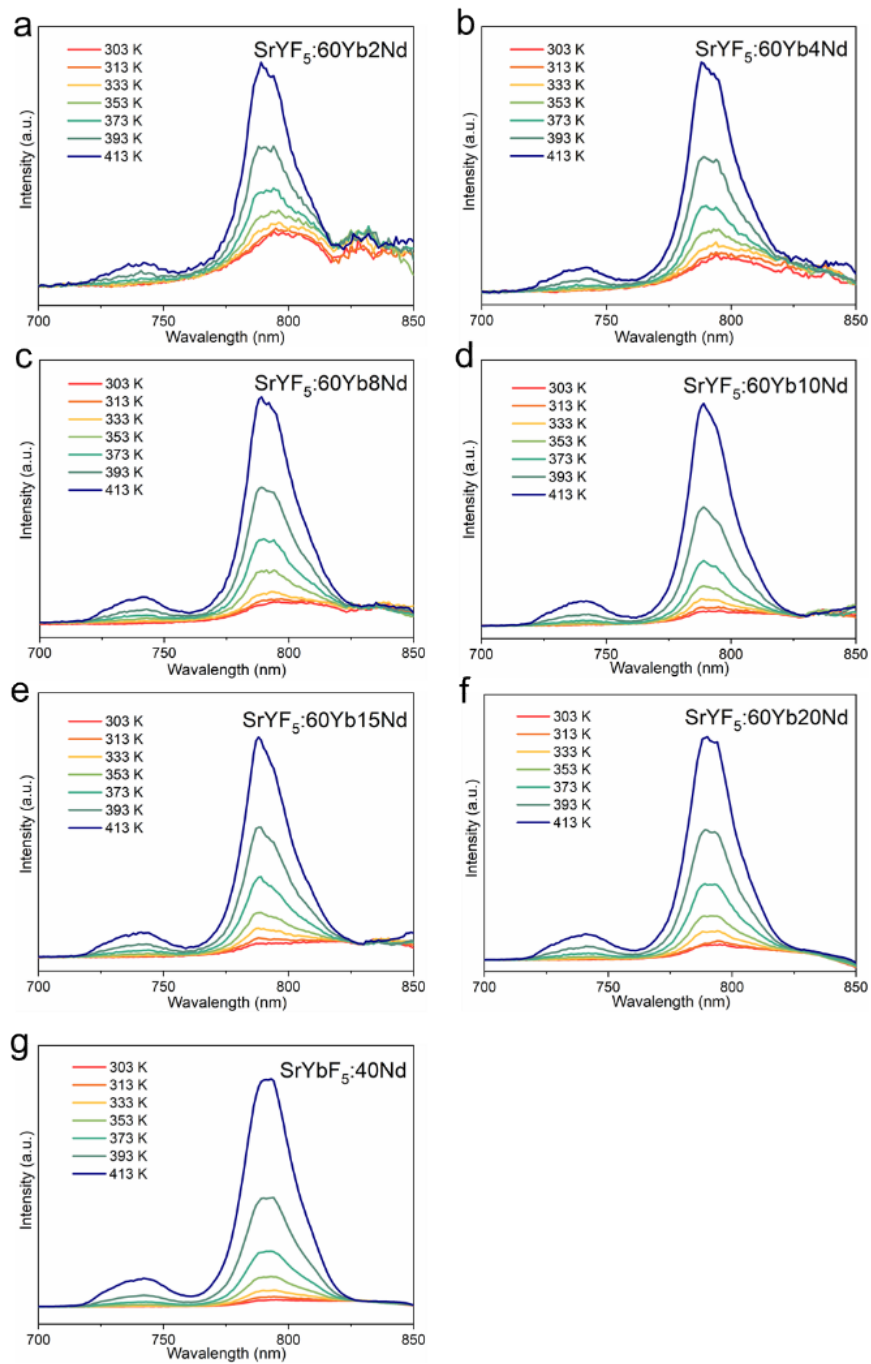

**Figure S3.** UC emission spectra of the SrYF<sub>5</sub>:60Yb/Nd with increasing the Nd<sup>3+</sup> ions concentration from 2 to 40 mol%.

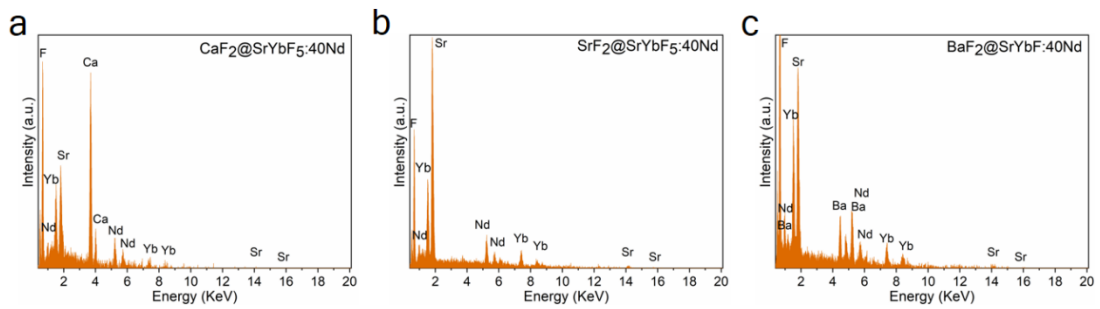

**Figure S4.** EDX spectra of the  $\text{CaF}_2@SrYbF_5:40Nd$ ,  $\text{SrF}_2@SrYbF_5:40Nd$  and  $\text{BaF}_2@SrYbF_5:40Nd$  NCs.

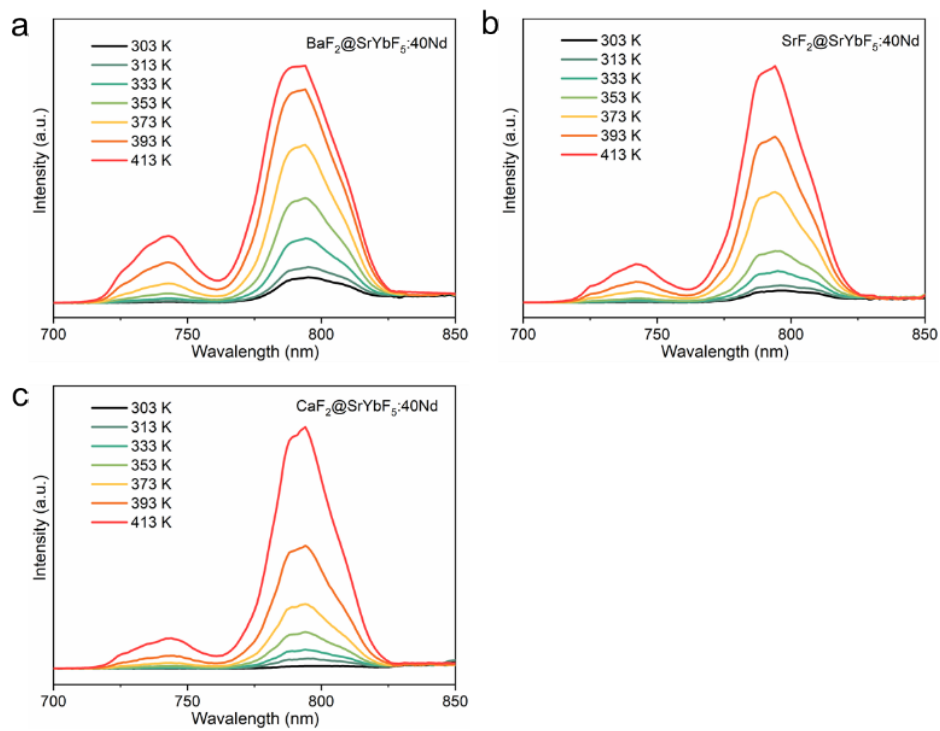

**Figure S5.** Temperature dependent UC emission spectra of (a)  $\text{BaF}_2@SrYbF_5:40Nd$ , (b)  $\text{SrF}_2@SrYbF_5:40Nd$  and (c)  $\text{CaF}_2@SrYbF_5:40Nd$  NCs.

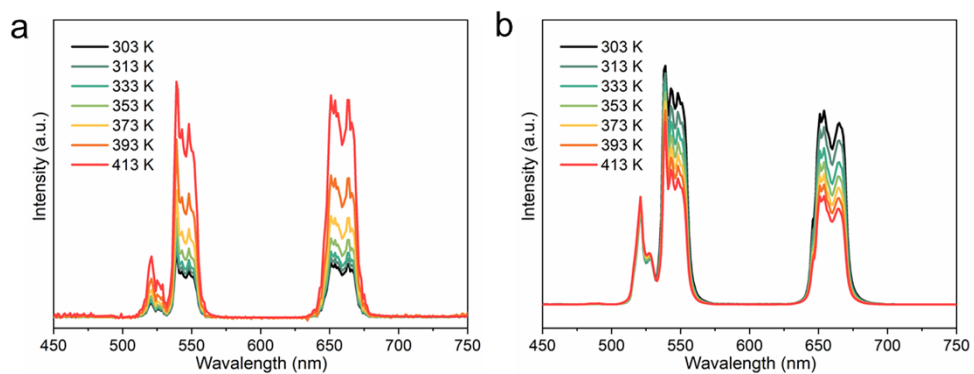

**Figure S6.** Temperature dependent UC emission spectra of (a)  $\text{SrYbF}_5:20Yb2Er$  and (b)  $\text{SrYbF}_5:20Yb2Er@CaF_2$ .



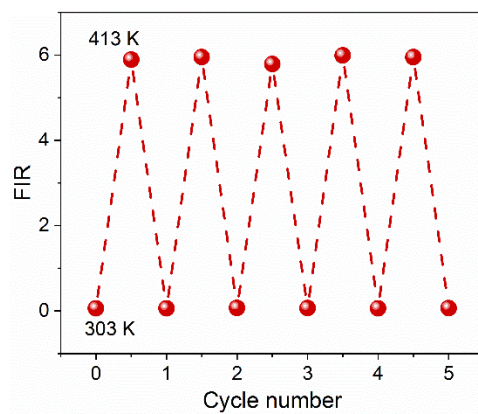

**Figure S7.** LIR of the SrYF<sub>5</sub>:10Yb<sub>2</sub>Er@CaF<sub>2</sub>@SrYbF<sub>5</sub>:40Nd at 303 K and 413 K within five cycles.

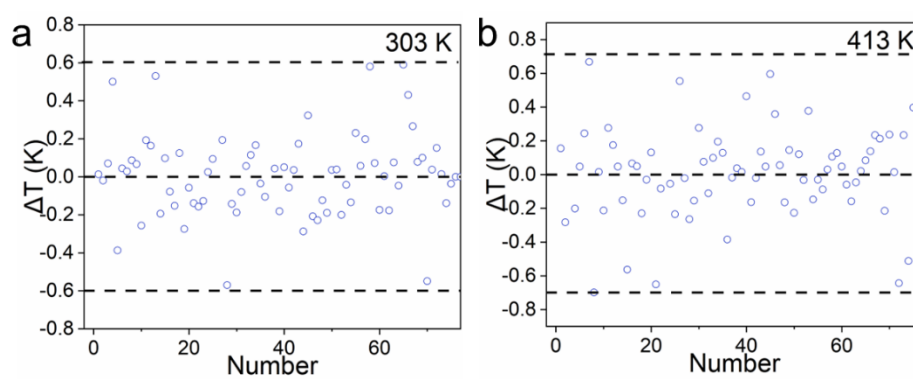

**Figure S8.** Calculated  $\Delta T$  at 303 (a), and 413 K (b) based on the experimental results of each cycle.

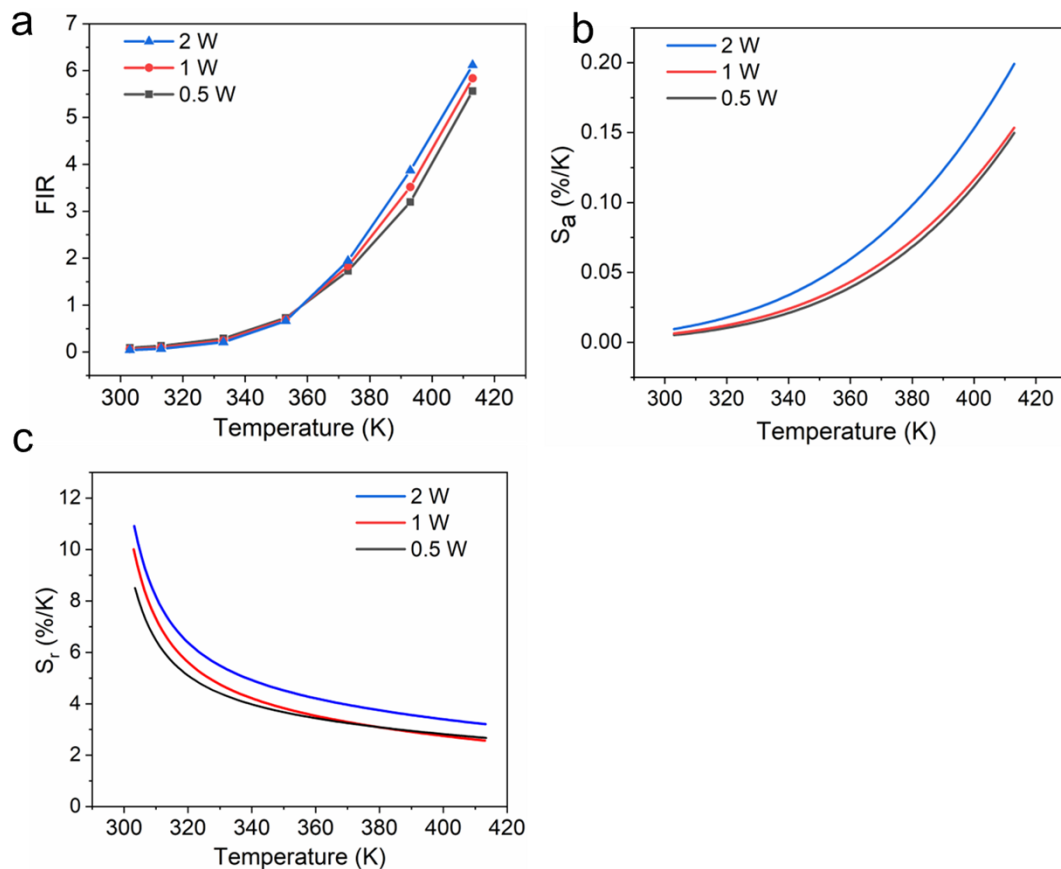

**Figure S9 (a)** Pumping power dependence FIR, calculated  $S_a$  (b) and  $S_r$  (c) of the  $\text{SrYF}_5:10\text{Yb}_2\text{Er}@\text{CaF}_2@\text{SrYbF}_5:40\text{Nd}$ .

## References.

- S1 Liu, F. W., Deng, D. G., Wu, M., Chen, B. W., Zhou, L. Y., Xu, S. Q. *J. Rare Earths*, 2021, **39**, 261-268.
- S2 Li, L., Tang, X. H., Wu, Z. J., Zheng, Y. F., Jiang, S., Tang, X., Xiang, G. T., Zhou, X. J. *J. Alloys Compd.*, 2019, **780**, 266-275.
- S3 Drabik, J., Cichy, B., Marciniak, L. *J. PHYS CHEM C*, 2018, **122**, 14928-14936.
- S4 Yuan, S. W., Zhao, S., Lou, L. L., Zhu, D. Y., Mu, Z. F., Wu, F. G. *Powder Technol.*, 2022, **395**, 83-92.
- S5 Ding, Y., Guo, N., Lu, X., Zhou, H. T., Wang, L., Ouyang, R. Z., Miao, Y. Q., Shao, B. Q. *J. Am. Ceram. Soc.*, 2019, **102**, 7436-7447.
- S6 Wu, Y. F., Suo, H., Zhao, X. Q., Zhou, Z. W., Guo, C. F. *Inorg. Chem. Front.*, 2018, **5**, 2456-2461.
- S7 Yao, H. Z., Zhang, Y. C., Xu, Y. *J. Alloys Compd.*, 2019, **770**, 149-157.
- S8 Tyminski, A., Smiechowicz, E., Martin, I. R., Grzyb, T. *ACS Appl. Nano Mater.*, 2020, **3**, 6541-6551.
- S9 Hu, T., Gao, Y., Molokeev, M., Xia, Z. G., Zhang, Q. Y. *Sci. China Mater.*, 2019, **62**, 1807-1814.
- S10 Li, C. X., Chen, B. W., Deng, D. G., Yu, H., Li, H., Shen, C. Y., Wang, L., Xu, S. Q. *J. Lumin.*, 2020, **221**, 117036.
- S11 Huang, F., Chen, D. Q. *J. Mater. Chem. C*, 2017, **5**, 5176-5182.
- S12 Zhang, H., Yang, H., Li, G. G., Liu, S. Q., Li, H. R., Gong, Y. M., Liang, Y. J., Chen, Y. J. *Chem. Eng. J.*, 2020, **396**, 125251.

- S13 Xue, J. P., Noh, H. M., Choi, B. C., Park, S. H., Kim, J. H., Jeong, J. H., Du, P. *Chem. Eng. J.*, 2020, **382**, 122861.
- S14 Pan, G. H., Zhang, L. L., Wu, H. J., Qu, X. S., Wu, H., Hao, Z. D., Zhang, L. G., Zhang, X., Zhang, J. H. *J. Mater. Chem. C*, 2020, **8**, 4518-4533.
- S15. Xie, C. Y., Wang, P., Lin, Y., Wei, X. T., Yin, M., Chen, Y. H. *J. Alloys Compd.*, 2020, **821**, 153467.
- S16 Sekulic, M., Dordevic, V., Ristic, Z., Medic, M., Dramicanin, M. D. *Adv. Opt. Mater.*, 2018, **6**, 1800552.
- S17 Chen, D. Q., Liu, S., Zhou, Y., Wan, Z. G., Huang, P., Ji, Z. G. *J. Mater. Chem. C*, 2016, **4**, 9044-9051.
- S18 Wang, C. L., Jin, Y. H., Yuan, L. F., Wu, H. Y., Ju, G. F., Li, Z. Z., Liu, D., Lv, Y., Chen, L., Hu, Y. H. *Chem. Eng. J.*, 2019, **374**, 992-1004.
- S19 Cui, M., Wang, J. D., Liu, J. H., Huang, S., Shang, M. M. *J. Lumin.*, 2019, **214**, 116588.
- S20 Mi, C., Zhou, J., Wang, F., Lin, G., Jin, D. *Chem. Mater.* 2019, **31**, 9480-9487.
